# Supplementary material for: Promotional effects of rare earth elements (Sc, Y, Ce, and Pr) on NiMgAl catalysts for dry reforming of methane
Source: Royal Society of Chemistry journal article supplement (doi:10.1039/c6ra19139h), 2016-01-01
Supplement: c6ra19139h1.pdf [file c6ra19139h1.pdf]

*Electronic Supplementary Information (ESI):*

**Promotional effects of rare earth elements (Sc, Y, Ce, and Pr) on  
NiMgAl catalysts for dry reforming of methane**

Yang Cao, Hongrui Li, Jianping Zhang, Liyi Shi and Dongsong Zhang\*

*Department of Chemistry, Research Center of Nano Science and Technology, Shanghai University,  
Shanghai 200444, P. R. China.*

*Fax: 86 21 66136079; E-mail: dszhang@shu.edu.cn*

## Supplementary data

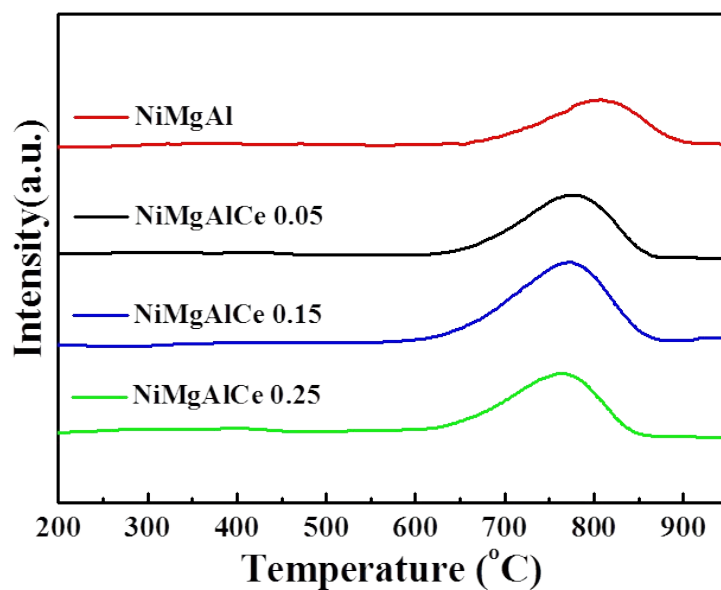

Fig. S1 H<sub>2</sub>-TPR profiles of NiMgAlCex catalysts.

The NiMgAlCex catalysts were prepared under the same conditions except for the different amounts of cerium nitrate (0.05mmol, 0.15mmol and 0.25mmol).

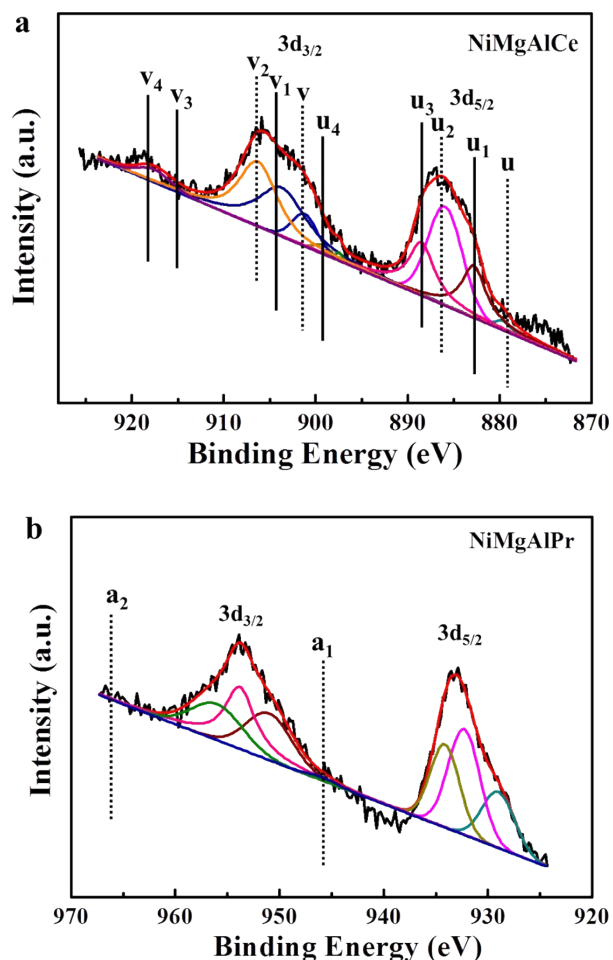

Fig. S2 (a) Ce 3d XPS spectra of NiMgAlCe catalyst; (b) Pr 3d XPS spectra of NiMgAlPr catalyst.

The Ce 3d XPS spectra of NiMgAlCe and Pr 3d XPS spectra of NiMgAlPr catalyst were shown in Figure. S2. The labels “v” and “u” represent the Ce 3d<sub>3/2</sub> and Ce 3d<sub>5/2</sub>, respectively. The peaks referred to u/u<sub>2</sub>/v/v<sub>2</sub> represent the presence of Ce<sup>3+</sup> and the other peaks were assigned to Ce<sup>4+</sup>. The estimated Ce<sup>3+</sup> concentration of total Ce on the NiMgAlCe catalyst is 29.8%. As shown in Fig. S2b, two XPS peaks located at 933.5 and 953.6 eV were assigned to the Pr 3d<sub>5/2</sub> and Pr 3d<sub>3/2</sub>, respectively. It is well-known that Pr oxides commonly coexist with Pr<sup>4+</sup> and Pr<sup>3+</sup>. The analysis indicated that Pr ions in the NiMgAlPr catalyst possessed dominantly the +3 valence state. However, the peaks at 946 eV (a<sub>1</sub>) and 967 eV (a<sub>2</sub>) were corresponds to the Pr<sup>4+</sup>, suggesting the presence of Pr<sup>4+</sup>.

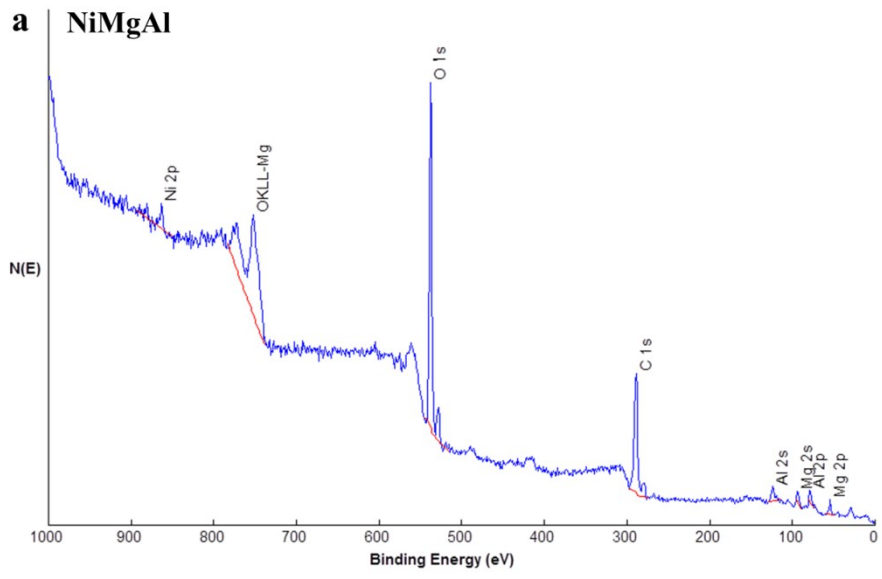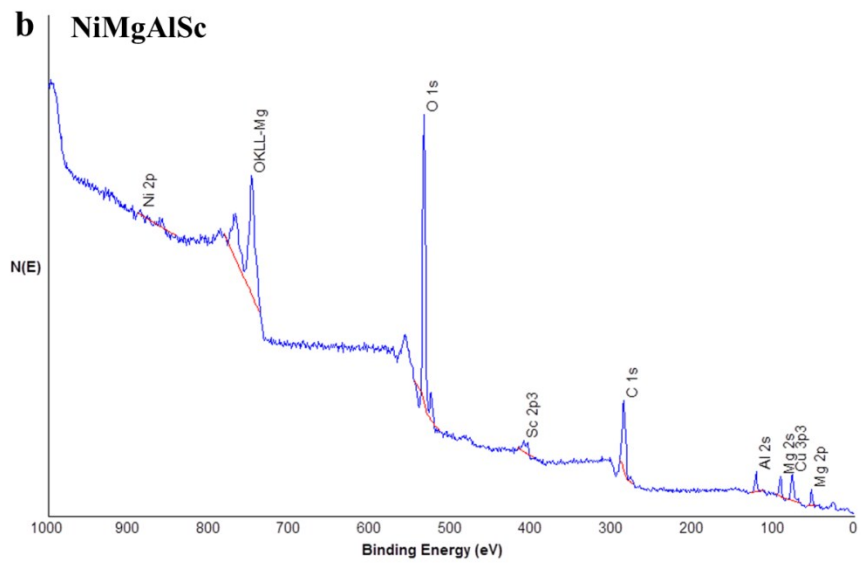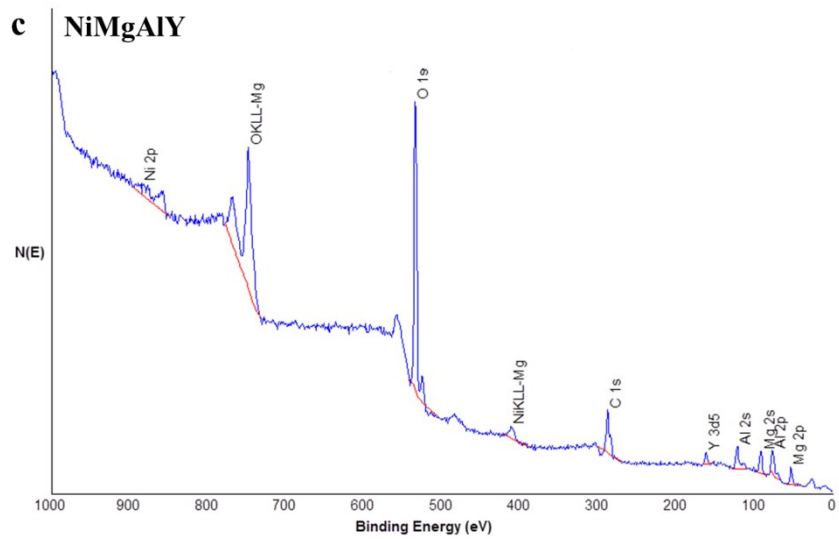

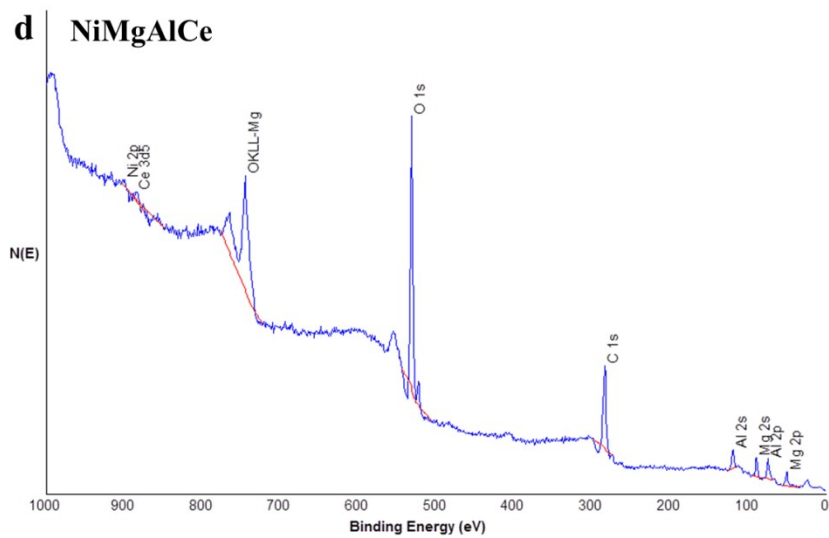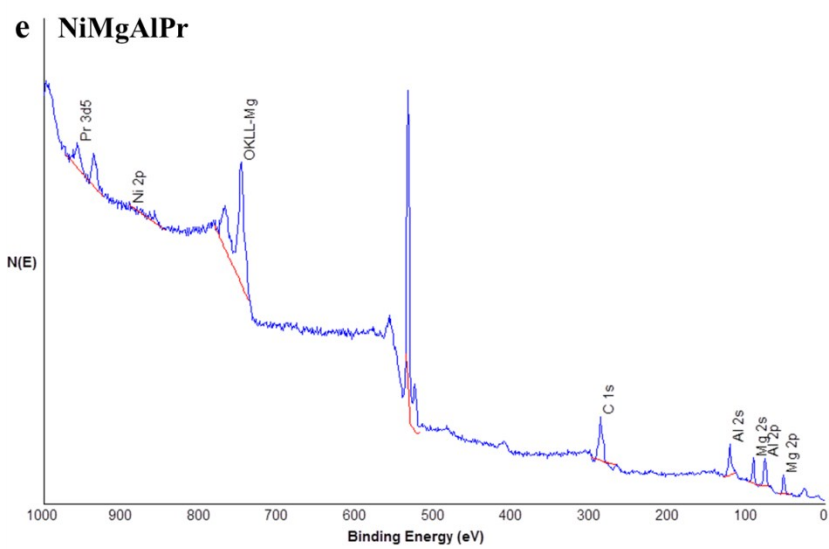

Fig. S3 XPS whole spectra of NiMgAl(RE) catalysts.

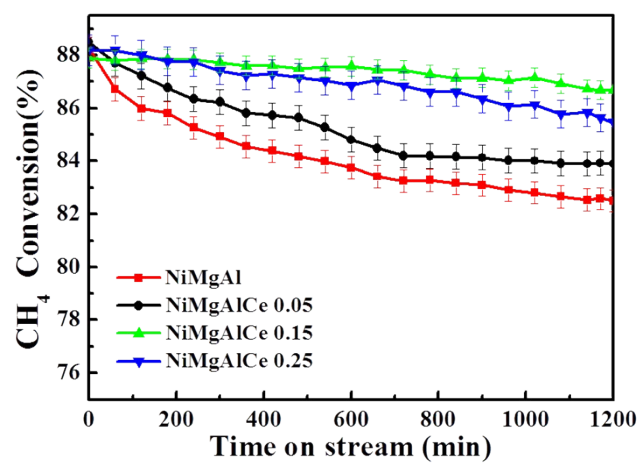

Fig. S4 The catalytic stability of NiMgAlCex catalysts.

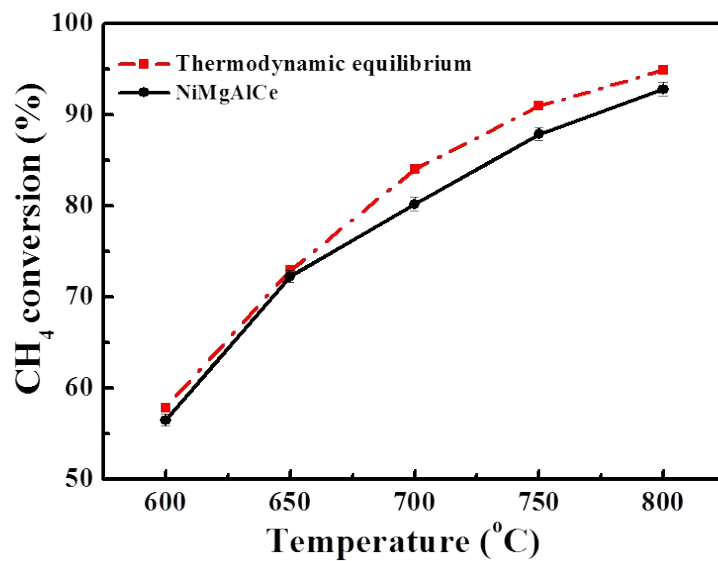

Fig. S5 DRM activity of the NiMgAlCe catalyst.

The activities of the NiMgAlCe catalyst were closer to the thermodynamic equilibrium conversions which could suggest the addition of Ce can inhibit the side reaction effectively.

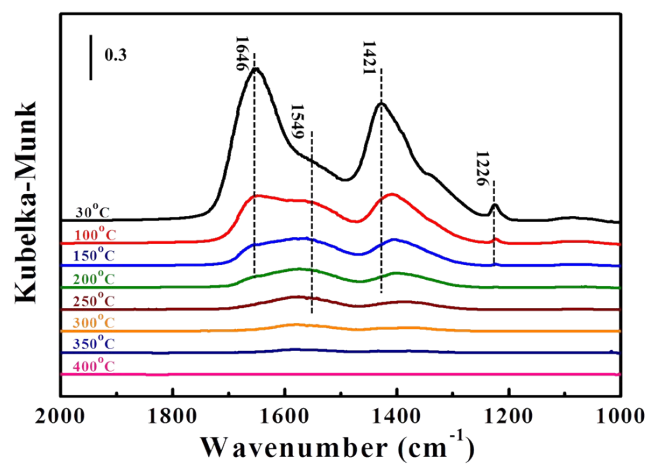

Fig. S6 *In situ* DRIFT spectra of CO<sub>2</sub> desorption over the NiMgAlCe catalyst as a function of time.

Table S1 Summary of the peaks in the spectra of CO<sub>2</sub> desorption.

| Wavenumber (cm <sup>-1</sup> ) | Assignment                      |
|--------------------------------|---------------------------------|
| 1226                           | symmetric stretch, bidentate    |
| 1421                           | symmetric stretch, monodentate  |
| 1549                           | asymmetric stretch, monodentate |
| 1646                           | asymmetric stretch, bidentate   |



Table S2 The conversion values of CH<sub>4</sub> reported in previous work

| Catalysts                                            | Temp. (°C) | Time X (h) | CH <sub>4</sub> conv. (%) |      | References |
|------------------------------------------------------|------------|------------|---------------------------|------|------------|
|                                                      |            |            | T=0h                      | T=Xh |            |
| Ni/ZrO <sub>2</sub>                                  | 750        | 12         | 53                        | 33   | ref. 1     |
| Ni/CeO <sub>2</sub>                                  | 700        | 5          | 80                        | 64   | ref. 2     |
| Ni/SiO <sub>2</sub> -F                               | 700        | 6          | 62                        | 56   | ref. 3     |
| LaNi <sub>0.4</sub> Ce <sub>0.6</sub> O <sub>3</sub> | 800        | 10         | 91                        | 80   | ref. 4     |
| La <sub>0.7</sub> Ca <sub>0.3</sub> NiO <sub>3</sub> | 750        | 10         | 78                        | 74   | ref. 5     |
| NiMgAlCe                                             | 750        | 20         | 88                        | 87   | This work  |

### References

1. V. M. Gonzalez-Delacruz, R. Pereñiguez, F. Ternero, J. P. Holgado and A. Caballero, *ACS Catal.*, 2011, 1, 82-88.
2. H. Ay and D. Üner, *Appl. Catal., B*, 2015, 179, 128-138.
3. S. Wen, M. Liang, J. Zou, S. Wang, X. Zhu, L. Liu and Z.-j. Wang, *J. Mater. Chem. A*, 2015, 3, 13299-13307.
4. T. V. Sagar, N. Sreelatha, G. Hanmant, M. Surendar, N. Lingaiah, K. S. Rama Rao, C. V. V. Satyanarayana, I. A. K. Reddy and P. S. Sai Prasad, *RSC Adv.*, 2014, 4, 50226-50232.
5. S. M. de Lima, M. A. Peña, J. L. G. Fierro and J. M. Assaf, *Catalysis Letters*, 2008, 124, 195-203.
